# Supplementary material for: Salvianolic acid B (Sal B) alleviates the decreased activity induced by prednisolone acetate on osteoblasts by up-regulation of bone formation and differentiation genes
Source: Royal Society of Chemistry journal article supplement (doi:10.1039/c9fo01246j), 2019-01-01
Supplement: c9fo01246j1.pdf [file c9fo01246j1.pdf]

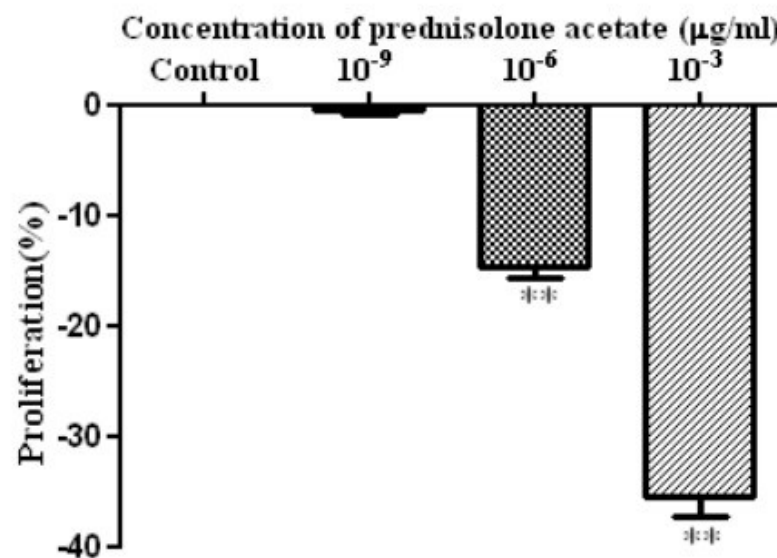

Fig.S1 Determine the concentration of prednisolone acetate. Effect of prednisolone acetate on the proliferation of osteoblast cell as examined by MTT assay. Prednisolone acetate has a very significant inhibitory effect on osteoblasts at  $10^{-6}\mu\text{g/mL}$ . The statistical results shown represent the means  $\pm$  SD; ( $n=5$ ). vs. the control group \*  $P<0.05$ , \*\*  $P<0.01$
